# Supplementary material
Source: HighWire-hosted journal article supplement (http://www.jrheum.org/highwire/filestream/29822/field_highwire_adjunct_files/0/160193_Data_Suppl_Updated_-_Use_This.pdf)

**Supplementary Table 1.** Quality assessment of the included studies.

| Author            | Year | QoPS score | Study participation | Study attrition | Prognostic factor measurement | Outcome measurement | Confounding measurement and account | Analysis |
|-------------------|------|------------|---------------------|-----------------|-------------------------------|---------------------|-------------------------------------|----------|
| Scire, C. A       | 2009 | 5          | u                   | y               | y                             | y                   | y                                   | y        |
| Saleem, B         | 2010 | 4          | y                   | y               | y                             | y                   | n                                   | n        |
| Peluso, G         | 2011 | 4          | y                   | y               | y                             | y                   | n                                   | u        |
| Saleem, B         | 2012 | 6          | y                   | y               | y                             | y                   | y                                   | y        |
| Foltz, V          | 2012 | 6          | y                   | y               | y                             | y                   | y                                   | y        |
| Iwamoto, T        | 2014 | 4          | y                   | y               | y                             | y                   | n                                   | n        |
| Yan Geng          | 2014 | 4          | y                   | u               | y                             | y                   | n                                   | y        |
| Ramirez Garcia, J | 2014 | 6          | y                   | y               | y                             | y                   | y                                   | y        |
| Van Der Ven, M    | 2014 | 4          | y                   | y               | y                             | y                   | n                                   | n        |
| Brown, A. K       | 2008 | 6          | y                   | y               | y                             | y                   | y                                   | y        |
| Raffeiner, B      | 2011 | 4          | y                   | y               | y                             | y                   | n                                   | n        |
| Yoshimi, R        | 2013 | 4          | y                   | y               | y                             | y                   | n                                   | n        |
| Ogishima, H       | 2014 | 3          | u                   | y               | y                             | y                   | n                                   | n        |

y, yes, the study described and handled the problem; n, no, the study did not describe or handle the problem; u, unclear, unclear descriptions of the problem in the study.

**Supplementary Table 2.** Baseline characteristics of the included patients.

| Author            | Year | Patients number | Remission number | Age  | Female (%) | Disease duration (years) | Duration of remission (months) | TJC  | SJC  | DAS 28 | HAQ   | PD   | GS   | PD+ (%) | GS+ (%) | Erosion (%) | RF+ (%) | Anti-CCP+ (%) | Shared epitope (%) |
|-------------------|------|-----------------|------------------|------|------------|--------------------------|--------------------------------|------|------|--------|-------|------|------|---------|---------|-------------|---------|---------------|--------------------|
| Scire, C. A       | 2009 | 106             | 43               | 59.5 | 70.8%      | 3.8 months               | ≥3                             | NA   | NA   | NA     | NA    | NA   | NA   | 41%     | NA      | NA          | 39%     | 29%           | 38%                |
| Saleem, B         | 2010 | 27              | 20               | 50   | 51.9%      | 19 months                | 8                              | 0    | 0    | 1.8    | 0     | 0    | 5    | NA      | NA      | NA          | 55%     | 45%           | NA                 |
| Peluso, G         | 2011 | 94              | 94               | 51.4 | 80.9%      | 61.7 months              | ≥6                             | 0.8  | 0.4  | 1.1    | 0.3   | 1.7  | 3.4  | NA      | NA      | NA          | 63.8%   | 58.5%         | NA                 |
| Saleem, B         | 2012 | 93              | 93               | 56.6 | 67.7%      | 7.0                      | 22                             | 0    | 1    | 2.29   | 0.337 | NA   | NA   | 62.4%   | 89.2%   | 69.9%       | 41.9%   | 59.4%         | 60.4%              |
| Foltz, V          | 2012 | 47              | 47               | 51.9 | 76.6%      | 31.4 months              | ≥2                             | 0.5  | 2.4  | 1.09   | NA    | 0.6  | NA   | 14.9%   | 87.2%   | 80.9%       | NA      | 51.1%         | NA                 |
| Iwamoto, T        | 2014 | 42              | 40               | 59.6 | 79%        | 8.2                      | 22.8                           | NA   | NA   | 1.9    | 0.2   | 0    | 6    | NA      | NA      | NA          | 83%     | 74%           | NA                 |
| Yan Geng          | 2014 | 72              | 72               | 44.9 | 80.6%      | 5.3                      | NA                             | 0.3  | 0.3  | 1.9    | NA    | 2.9  | 3.4  | 55.6%   | 61.1%   | 51.4%       | 72.2%   | 71.4%         | NA                 |
| Ramirez Garcia, J | 2014 | 28              | 28               | 51.9 | 82.1%      | 108.2 months             | NA                             | NA   | NA   | NA     | NA    | NA   | NA   | 60.7%   | NA      | NA          | NA      | NA            | NA                 |
| Van Der Ven, M    | 2014 | 67              | 67               | NA   | NA         | NA                       | NA                             | NA   | NA   | NA     | NA    | NA   | NA   | 41.8%   | NA      | NA          | NA      | NA            | NA                 |
| Brown, A. K       | 2008 | 102             | 90               | 57   | 67%        | 7                        | 22                             | 0    | 1    | 2.53   | 0.31  | NA   | NA   | 63%     | 89%     | 68%         | 64%     | NA            | 61%                |
| Raffaener, B      | 2011 | 109             | 109              | NA   | NA         | NA                       | NA                             | NA   | NA   | NA     | NA    | NA   | NA   | NA      | NA      | NA          | NA      | NA            | NA                 |
| Yoshimi, R        | 2013 | 31              | 22               | 55.2 | 87.1%      | 5                        | 16                             | 0.29 | 0.48 | 2.06   | NA    | 2.58 | 9.26 | 63.6%   | NA      | NA          | 85.2%   | NA            | NA                 |
| Ogishima, H       | 2014 | 77              | 30               | 50.6 | 83.1%      | 7.2                      | NA                             | 2.2  | 4.2  | NA     | NA    | NA   | NA   | NA      | NA      | NA          | 77.9%   | 84.5%         | NA                 |

Values are presented as mean or median; NA, not available

**Supplementary Figure 1.** Summary of the association between ultrasonic Grey scale score and risk of flare.

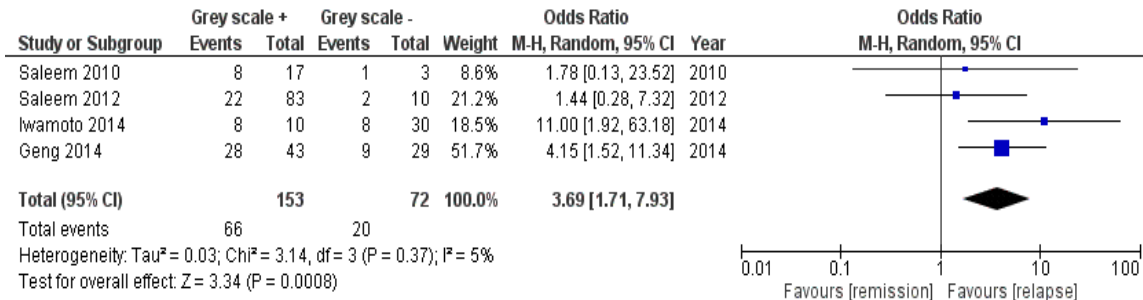

**Supplementary Figure 2.** Cumulative meta-analysis of the association between ultrasonic Power doppler score and risk of flare.

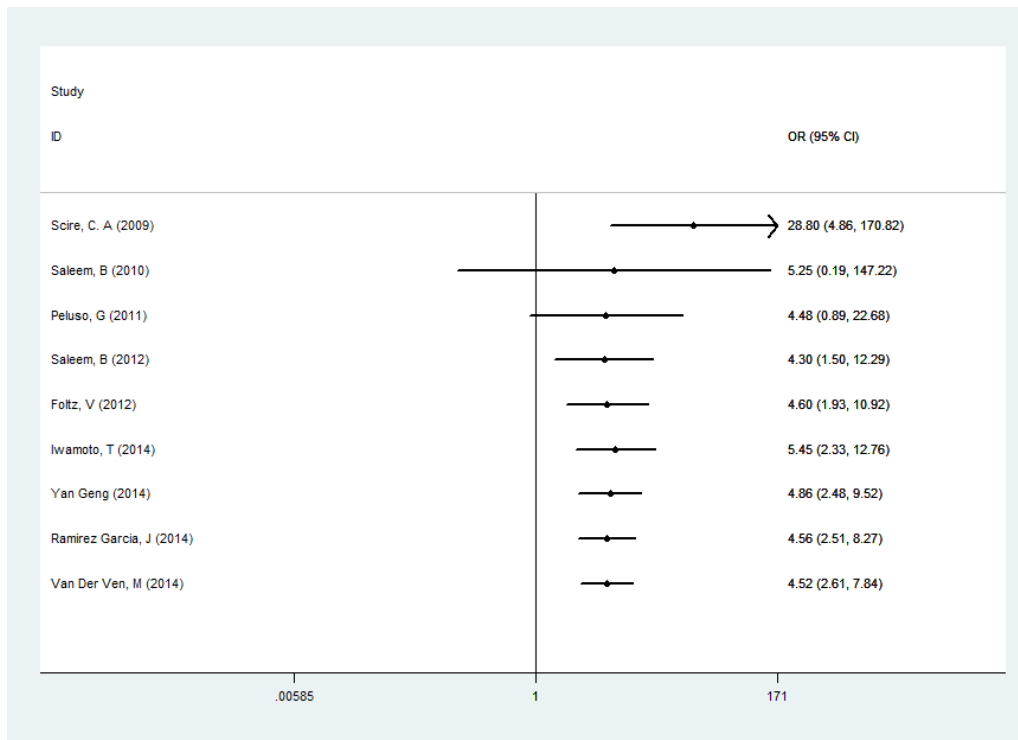

Supplement: 160193_Data_Suppl_Updated_-_Use_This.pdf [file 160193_Data_Suppl_Updated_-_Use_This.pdf]
